# Supplementary material for: Next-Generation Cellulosic Filaments from Hemp Pulp via Dry-Jet Wet Spinning Using HighPerCell® Technology
Source: MDPI journal article supplement (doi:10.3390/fib11110090), 2023-10-26
Supplement: s1 [file s1]

# Next-Generation Cellulosic Filaments from Hemp Pulp via Dry-Jet Wet Spinning Using HighPerCell® Technology

Antje Ota <sup>1,\*</sup>, Marc Philip Vocht <sup>1</sup>, Ronald Beyer <sup>1</sup>, Anne Reboux <sup>2</sup>, Charles Reboux <sup>2</sup> and Frank Hermanutz <sup>1</sup>

<sup>1</sup> German Institutes of Textile and Fiber Research Denkendorf (DITF),  
73770 Denkendorf, Germany

<sup>2</sup> RBX Créations, 17520 Neuillac, France

**Table S1.** Degree of crystallinity ( $I_c$ ) and degree of crystalline orientation ( $f_t$ ) of the filaments at 65 °C with different DR and different pulps: WP wood pulp and HP hemp pulp by RBX.

| Sample-ID  | WP-F            |      | HP-F            |                 |
|------------|-----------------|------|-----------------|-----------------|
|            | -1              | -2   | -1              | -2              |
| DR         | 7.7             | 9.6  | 7.7             | 9.6             |
| $I_c$ [%]  | 65              | n.d. | n.d.            | 65              |
| $\Delta n$ | 0.040           | n.d. | 0.040           | 0.042           |
| $f_t$      | $0.66 \pm 0.04$ | n.d. | $0.66 \pm 0.02$ | $0.68 \pm 0.04$ |

n.d.—not determined.
